1  
2  
3  
4  
5  
6  
7  
8  
9  
10  
11  
12  
13  
14  
15  
16  
17  
18  
19  
20  
21  
22  
23  
24  
25  
26  
27  
28  
29  
30

## Autoimmunity increases susceptibility to and mortality from sepsis

Isaac J. Jensen<sup>1\*</sup>, Samantha N. Jensen<sup>1\*</sup>, Patrick W. McGonagill<sup>2</sup>, Thomas S. Griffith<sup>3</sup>, Ashutosh K. Mangalam<sup>4</sup>, and Vladimir P. Badovinac<sup>5%</sup>

<sup>1</sup>Interdisciplinary Graduate Program in Immunology, University of Iowa, Iowa City, IA; Department of Pathology, University of Iowa, Iowa City, IA

<sup>2</sup>Department of Surgery, University of Iowa, Iowa City, IA.

<sup>3</sup>Microbiology, Immunology, and Cancer Biology PhD Program, University of Minnesota, Minneapolis, MN; Department of Urology, University of Minnesota, Minneapolis, MN; Center for Immunology, University of Minnesota, Minneapolis, MN; Masonic Cancer Center, University of Minnesota, Minneapolis, MN; Minneapolis VA Health Care System, Minneapolis, MN

<sup>4</sup>Interdisciplinary Graduate Program in Immunology, University of Iowa, Iowa City, IA; Department of Pathology, University of Iowa, Iowa City, IA

<sup>5</sup>Interdisciplinary Graduate Program in Immunology, University of Iowa, Iowa City, IA; Department of Pathology, University of Iowa, Iowa City, IA; Department of Microbiology and Immunology, University of Iowa, Iowa City, IA.

\*Co-first authors: Isaac J. Jensen and Samantha N. Jensen

%Correspondence: [vladimir-badovinac@uiowa.edu](mailto:vladimir-badovinac@uiowa.edu)

**Funding:** Authors are supported by grants from the National Institutes of Health: 5R01AI114543, 1R35GM134880 to VPB, R01GM115462, 1R35GM140881 to TSG, 5R01AI137075 to AKM, T32AI007511, T32AI007485 to IJJ, T32AI007485, and 1R01AI137075-S1 to SNJ; Veterans Health Administration: I01BX001324 to TSG; University of Iowa Environmental Health Sciences Research Center, NIEHS/NIH: P30 ES005605 to AKM

31 **Summary**

32 Our prior publication detailing how sepsis influences subsequent development of EAE presented a  
33 conceptual advance in understanding the post-sepsis chronic immunoparalysis state (Jensen et al.,  
34 2020). However, the reverse scenario (autoimmunity prior to sepsis) defines a high-risk patient  
35 population whose susceptibility to sepsis remains poorly defined. Herein, we present a retrospective  
36 analysis of University of Iowa Hospital and Clinics patients demonstrating increased sepsis incidence  
37 among MS, relative to non-MS, patients. To interrogate how autoimmune disease influences host  
38 susceptibility to sepsis well-established murine models of MS and sepsis, EAE and CLP, respectively,  
39 were utilized. EAE, relative to non-EAE, mice were highly susceptible to sepsis-induced mortality with  
40 elevated cytokine storms. These results were further recapitulated in LPS and *S. pneumoniae* sepsis  
41 models. This work highlights both the relevance of identifying highly susceptible patient populations and  
42 expands the growing body of literature that host immune status at the time of septic insult is a potent  
43 mortality determinant.

44 **Introduction**

45 Multiple sclerosis (MS) is an autoimmune demyelinating disease of the central nervous system (CNS)  
46 that affects ~2.8 million individuals worldwide, and cases are rising (Fox, 2004; Walton et al., 2020). The  
47 symptomology of MS includes (but is not limited to) pain, motor dysfunction, and cognitive dysfunction.  
48 The etiology of MS is not well understood, but is thought to stem from a complex interaction of genetic  
49 and environmental factors (Dendrou et al., 2015; Freedman et al., 2018). MS is commonly diagnosed  
50 between the ages of 20-40, although underlying subclinical pathogenesis may be present long before  
51 diagnosis. MS pathogenesis is mediated by proinflammatory auto-reactive T cells and other immune  
52 cells activated prior to migration into the CNS to promote axonal damage (Fox, 2004). In an attempt to  
53 subvert the aberrant immune response to the CNS, immunomodulatory/immunosuppressive drugs are  
54 often prescribed to patients with MS with varying degrees of success (Tintore et al., 2019).  
55 Unfortunately, the use of disease-modifying drugs in patients with MS often comes with increased risk of  
56 opportunistic infection (Yong and Kim, 2020). The increased propensity to infection may leave MS  
57 patients at an increased risk of sepsis.

58  
59 Sepsis, a dysregulated host response to infection, impacts 9 people every 6 seconds of which 2 will  
60 succumb to the associated cytokine storm (Rudd et al., 2020). Additionally, those who survive  
61 demonstrate increased susceptibility to subsequent infection or cancer development (Danahy et al.,  
62 2019; Hotchkiss et al., 2016; Jensen et al., 2018a; Jensen et al., 2018b). This increased risk for  
63 secondary complication leads to a substantial economic burden costing over \$20 billion annually in the  
64 United States alone (CDC, 2020). While mortality due to the cytokine storm has diminished over time  
65 due to early intervention, the sepsis mortality rate of ~20% is still excessive (Dombrovskiy et al., 2007;  
66 Gaieski et al., 2013). Mortality from sepsis is in part due the complexity and interconnectedness of the  
67 cytokine storm that is composed of both pro- and anti-inflammatory cytokines (Danahy et al., 2016;  
68 Delano and Ward, 2016; Jensen et al., 2021), and is further complicated by individual comorbidities

69 (Rhee et al., 2017; Rhee et al., 2019). The underlying link between MS and subsequent sepsis is not  
70 clear. MS patients are often prescribed one of several immunosuppressant drugs, putting them at  
71 greater risk of infection. Indeed, certain disease-modifying therapies for MS pose a greater risk for  
72 infection, such as rituximab, compared to others (Luna et al., 2020).

73

74 Patients with autoimmune diseases, such as MS, are often treated with immunomodulatory drugs that  
75 may increase their susceptibility to infection and sepsis. For example, urinary tract infection (UTI) and  
76 respiratory infection, are both a common causes of sepsis (Jeganathan et al., 2017) and complications  
77 for MS patients, relative to the general population (Harding et al., 2020; Medeiros Junior et al., 2020). In  
78 fact, compared to the general healthy population, individuals with MS are at greater risk of sepsis,  
79 sepsis-induced complications, and death due to infection (Capkun et al., 2015). MS patients are also  
80 more likely to have a principal diagnosis of infection at their final hospital stay prior to death compared to  
81 the general healthy population and individuals with diabetes mellitus (Ernst et al., 2016). Moreover,  
82 sepsis was a secondary diagnosis for 51% of MS patients compared to 36% and 31% of diabetes  
83 mellitus and general healthy individuals, respectively, during a hospital stay (Ernst et al., 2016)  
84 demonstrating that even among autoimmune disease MS patients are at increased risk of developing  
85 sepsis. The increased propensity to become septic also extends to military veterans, a population that is  
86 skewed toward individuals >50 years of age and male (Livingston, 2016), both of which are associated  
87 with an increased incidence of sepsis. Lastly, veterans with MS are more likely to be hospitalized and  
88 die from infection compared with veterans without MS (Nelson et al., 2015).

89

90 We previously studied the impact of sepsis on subsequent MS-like disease using the experimental  
91 autoimmune encephalomyelitis (EAE) animal model as a means of conceptually interrogating the  
92 immunoparalysis state that occurs after sepsis (Jensen et al., 2020). However, there is a strong need to  
93 understand how underlying autoimmune conditions, such as MS, influence susceptibility to sepsis-

94 induced mortality given the increased incidence in this potentially vulnerable population. Thus, with this  
95 *Research Advance* we affirm the increased incidence of sepsis in MS patient cohorts relative to non-MS  
96 patient cohorts and interrogate how autoimmunity as a comorbidity in septic populations influences  
97 susceptibility to sepsis-induced mortality utilizing murine models of MS (EAE) sepsis (cecal ligation and  
98 puncture [CLP], LPS, and *S. pneumoniae*).

99

## 100 **Results and Discussion**

### 101 MS patients are more prone to sepsis than the general population

102 Prior literature suggests an increased susceptibility of MS patients to develop sepsis relative to non-MS  
103 patient cohorts (Capkun et al., 2015). Therefore, to begin interrogating this potentially interesting  
104 interplay, we performed a retrospective analysis of ICU admissions at the University of Iowa Hospital  
105 and Clinics. This analysis included 211,470 patients admitted between 2008 and 2020, of which there  
106 were 22,930 that were septic and 1,180 that had MS (**Table 1**). Notable features of these patient cohorts  
107 included: septic patients tended to be older and male – known risk factors associated with developing  
108 sepsis (Rhee et al., 2017; Rhee et al., 2019), while MS patients tended to be female – MS is a known  
109 female biased disease (Fox, 2004). There was also a slight increase in the proportion of Caucasian  
110 patients among the septic patients. Importantly, MS patients exhibited a significant increase in sepsis  
111 incidence (14.4%) relative to non-MS patients (10.8%; Odds ratio: 1.387,  $p=0.0001$ ). Additionally, while  
112 MS patients tended to be female, there was a higher proportion of males among the septic MS patients  
113 (35%) relative to the non-septic MS patients (26%). Further, septic MS patients also tended to be older  
114 (64+/-14 years) than their non-septic MS patient counterparts (56+/-16 years). These data reaffirm both  
115 the higher incidence of sepsis in males and with age even within the MS patient cohort. Overall, these  
116 data affirm that MS patients have an increased incidence of sepsis relative to non-MS patient cohorts.

117

### 118 EAE increases host susceptibility to sepsis induce mortality

119 Given that MS patients have a higher incidence of sepsis, we sought to understand how having an  
120 ongoing autoimmune disease would influence host susceptibility to sepsis. To address this relationship,  
121 well-established models of inducible MS-like disease and polymicrobial sepsis, EAE and CLP,  
122 respectively, were used. C57BL/6 mice were immunized with MOG<sub>35-55</sub> to induce EAE or left  
123 unimmunized (non-EAE). CLP or sham surgery was performed >35 days post-immunization and  
124 mortality was assessed (**Figure 1a**). To ensure that mortality was not simply due to ongoing EAE  
125 disease, EAE mice were segregated into sham and CLP groups to establish a similar distribution of EAE  
126 clinical scores prior to surgery (**Figure 1b**). Non-EAE mice exhibited some mortality, however, EAE mice  
127 had diminished survival relative to non-EAE mice (**Figure 1c**). Importantly, EAE mice that underwent  
128 sham surgery did not have any mortality, consistent with the model system and demonstrating that  
129 mortality in EAE with CLP was not due to EAE disease. These data also suggest the presence of CNS  
130 autoimmunity increases the host susceptibility to a fatal septic event. Interestingly, there was an  
131 observed relationship between the EAE disease score prior to sepsis induction and the likelihood of  
132 mortality (**Figure 1d,e**). Mice with a score of  $\leq 2$  had a similar survival rate to naïve CLP mice, whereas  
133 all mice with an EAE score >2 succumbed to disease (**Figure 1e**).

134

### 135 Auto-immune inflammation, not clinical disease, dictates susceptibility to sepsis

136 The relationship between disease severity and mortality suggests that either the paralysis and  
137 associated neurologic damage during EAE is promoting sepsis-induced mortality or differences in the  
138 inflammatory response may increase the likelihood of mortality. Indeed, we previously reported that  
139 microbially-experienced ‘dirty’ mice with a high degree of immunologic experience are highly susceptible  
140 to sepsis-induced mortality due (in part) to elevations in plasma cytokine concentrations both at a  
141 baseline and during the peak (~12hrs post-induction) of the cytokine storm (Huggins et al., 2019).  
142 Similarly, we have also described a relationship between tumor size at the time of sepsis induction and  
143 host mortality (Danahy et al., 2019). Thus, to begin teasing apart the roles of the interconnected

144 phenomena of inflammation and paralysis, mice were immunized at varying times leading up to sepsis  
145 induction. This approach establishes a scenario in which disease is subclinical (D5), being established  
146 (D15), or fulminant (D25) with ongoing inflammation anticipated in all cohorts (**Figure 2a**). Clinical  
147 disease progression occurred in agreement with these expectations (**Figure 2b**). All EAE cohorts,  
148 however, exhibited profound susceptibility to sepsis-induced mortality, demonstrating that clinical  
149 disease and paralysis were not required for sepsis-induced mortality (**Figure 2c**).

150

151 To then address the extent to which EAE, similar to infection and cancer, was altering the severity of the  
152 sepsis-induced cytokine storm, plasma was collected prior to and 12hrs post-CLP surgery in D5, D15,  
153 and D25 (as well as non-EAE) mice and assessed for IL-6, TNF, IL-1 $\beta$ , IFN $\gamma$ , IL-10, IL2, and IL-12p70  
154 (**Figure 3a**). Importantly, while there was a cytokine storm in all CLP cohorts, the magnitude of the  
155 cytokine storm was substantially higher in EAE mice relative to the non-EAE mice (**Figure 3b-d**).

156 Further, EAE mice had a higher baseline expression of many cytokines (**Figure 3c,d**) recapitulating  
157 observations in 'dirty' mice (Huggins et al., 2019). Of particular note was IL-6 which has previously been  
158 described as a strong indicator of the severity of the cytokine storm (Ma et al., 2016; Qiao et al., 2018;  
159 Qiu et al., 2018) and was strongly increased in all EAE groups both prior to and after CLP (**Figure 3d**).

160

161 These results then led us to question whether there was a quantitative difference in the magnitude of the  
162 cytokine storm between survivor and non-survivor mice at D35 post-EAE induction. Thus, plasma IL-6  
163 and IL-10 were interrogated in survivor and non-survivor EAE mice as well as non-EAE mice prior to and  
164 12 hrs after EAE induction (**Figure 3-figure supplement 1**). Indeed, non-survivor mice had an elevated  
165 cytokine storm while survivor mice had a similar magnitude of the cytokine storm as non-EAE mice. This  
166 finding further illustrates the susceptibility of EAE mice to sepsis-induced mortality is through  
167 enhancement of the cytokine storm.

168

169 EAE mice have increased susceptibility to various models of sepsis induction

170 Given the high susceptibility of EAE mice to fatal CLP-induced sepsis, we sought to extend the  
171 applicability of this effect to other models of sepsis induction. Intraperitoneal injection of  
172 lipopolysaccharide (LPS) is a well-established model of endotoxemia and sepsis with a highly tunable  
173 degree of mortality by modulating the concentration of LPS (Danahy et al., 2016; Dickson and Lehmann,  
174 2019). With this system, a dose of LPS that elicits a robust cytokine storm, but does not elicit mortality in  
175 unmanipulated (e.g., non-EAE) mice, was interrogated (Huggins et al., 2019). LPS was injected 15 days  
176 post-EAE induction on EAE and non-EAE cohorts, and mortality was monitored throughout with plasma  
177 IL-6 evaluated prior to and 12 hrs post-LPS injection (**Figure 4a**). Consistent with prior experiments,  
178 EAE mice had a range of disease scores (**Figure 4b**). Importantly, while non-EAE mice exhibited no  
179 mortality, as anticipated, EAE mice exhibited rapid and profound mortality recapitulating the  
180 observations with CLP (**Figure 4c**). The enhanced mortality of EAE mice was attributable to increased  
181 IL-6 following LPS injection (**Figure 4d**), similar to observations with CLP mice. These data demonstrate  
182 increased sensitivity to TLR4 stimulation likely contributes to the enhanced mortality among EAE mice.

183  
184 Next, we examined the impact of having EAE followed by an intranasal *Streptococcus pneumoniae* (*S.*  
185 *pneumoniae*) infection. *S. pneumoniae* is the most prevalent causative pathogen of community acquired  
186 pneumonia, and *S. pneumoniae* models of sepsis have high clinical relevance, as nearly half of all  
187 sepsis cases result from this bacterial infection (Brown, 2012). Similar to the LPS endotoxemia model,  
188 *S. pneumoniae* infection in this system does not lead to mortality in unmanipulated mice. It does,  
189 however, represent a relevant respiratory infection (Bogaert et al., 2004), which are both a common  
190 cause of sepsis (Jeganathan et al., 2017) and a frequent complication among MS patients (Harding et  
191 al., 2020). Further host ability to control the infection can be assessed by determining the number of  
192 colony forming units (CFUs) in the lungs and plasma cytokines to give an indication of the host ability to  
193 mount an inflammatory response and clear infection. Utilizing this system, EAE mice and non-EAE



194 controls were intranasally inoculated with *S. pneumoniae* 15 days post-EAE induction. Plasma IL-6 was  
195 evaluated prior to and 12 hrs post-*S. pneumoniae* infection. Additionally, lung *S. pneumoniae* CFUs  
196 were evaluated in 3 mice from each cohort 3 days after infection while mortality was monitored in the  
197 remaining mice (**Figure 4e**). As before, EAE mice exhibited a range of disease severity prior to infection  
198 (**Figure 4f**) and some mortality subsequent to the insult (**Figure 4g**), though this mortality was not  
199 significantly different from non-EAE control mice. Further, a trending increase in plasma IL-6 was  
200 observed from EAE mice 12 hrs post-*S. pneumoniae* infection (**Figure 4h**), in agreement with the prior  
201 findings of an elevated inflammatory response in EAE mice challenged with either CLP or LPS.  
202 Interestingly, EAE mice also had reduced control of *S. pneumoniae* infection 3 days post-infection,  
203 relative to non-EAE mice (**Figure 4i**). These data indicates that despite enhanced inflammation, EAE  
204 mice have a dysregulated inflammatory response that has reduced capacity to provide protection to  
205 subsequent insult. Thus, the culmination of enhanced inflammatory responses with a reduced capacity  
206 to control pathogen insult may set the stage for the enhanced susceptibility of EAE mice, and MS  
207 patients, to develop and succumb to septic insults.  
208  
209 Cumulatively, these findings indicate that MS patients are at a higher risk of developing sepsis and  
210 ongoing autoimmune reactions lay the groundwork for an exacerbated inflammatory response during  
211 septic insult that in turn increases the risk of mortality. This conclusion is relevant to both the  
212 identification and management of patient populations that are likely to become septic and at high risk of  
213 mortality in the event they become septic. Future work should interrogate the utility of intervention  
214 strategies in promoting survival of sepsis and assessments of intervention strategies should account for  
215 these highly relevant comorbidities in determining efficacy. Importantly, patients with autoimmunity tend  
216 be on immunosuppressive regimens (Tintore et al., 2019; Yong and Kim, 2020), while it is yet unclear  
217 what the net result of these interventions are on the development of sepsis, these immunosuppressive  
218 regimens will undoubtedly be pertinent to the management of the cytokine storm.

219

220 Alternately, it is also relevant to consider the consequences for a patient with autoimmunity who survives  
221 a septic insult. This notion is highly related to our previous findings, wherein we observed sepsis-  
222 induced immunoparalysis ablated the subsequent development of EAE through the numeric reduction in  
223 naïve autoantigen specific CD4 T cells (Jensen et al., 2020). Indeed, sepsis similarly reduces the  
224 number and function effector and memory T cells (Cabrera-Perez et al., 2014; Danahy et al., 2017;  
225 Duong et al., 2014; Martin et al., 2020; Sjaastad et al., 2020b). Therefore, it is plausible for those  
226 individuals that survive to experience a reduction in their autoimmune disease symptoms. Contrastingly,  
227 sepsis may also reduce the capacity of suppressor cell populations to mediate their activity and lead to  
228 disease exacerbation (Cavassani et al., 2010; Scumpia et al., 2006; Sharma et al., 2015). There are  
229 likely multiple complicating factors that dictate whether any such benefit or detriment arises, including  
230 the stage of autoimmune disease progression. Such interrogation may lead to enhanced understanding  
231 of the sepsis-induced immunoparalysis state or even future therapeutic intervention for MS and  
232 autoimmune disease patients.

233

234 Finally, it is relevant to consider the observation that clinical disease was not required for the  
235 enhancement in mortality among EAE mice. This finding suggests individuals with subclinical or newly  
236 developing autoimmunity may be at risk for increased mortality from sepsis. This possibility may be  
237 problematic for delineating patient populations with high susceptibility to sepsis-induced mortality as it  
238 may not be a recognized complicating factor. Thus, enhanced susceptibility of patient populations to  
239 sepsis-induced mortality may be better understood as a result of active inflammatory responses prior to  
240 septic insult rather than highly specific comorbidities such as autoimmunity or cancer. These are highly  
241 relevant notions when seeking to promote survival and develop future therapeutics.

242

243

244

## 245 **Figure Legends**

246 **Figure 1: EAE mice have increased susceptibility to sepsis-induced mortality. A)** Experimental

247 Design: C57BL/6 mice were immunized with MOG<sub>35-55</sub> to induce EAE. EAE mice underwent either sham  
248 or CLP 35 days after EAE induction followed by assessment of mortality, age matched non-immunized

249 (non-EAE) underwent CLP surgery at the same time. **(B)** EAE clinical scores of mice prior to either

250 sham or CLP surgery. **(C)** Kaplan-Meier survival curves of EAE mice that underwent sham (black closed

251 circle) or CLP (red semi-circle) surgery and non-EAE mice that underwent CLP surgery (red closed

252 circle with black outline). **(D)** EAE clinical scores prior to surgery of EAE mice that either succumbed to

253 or survived the septic insult. **(E)** Kaplan-Meier survival curves of EAE mice that underwent sham (black

254 circle), had an EAE score  $\leq 2$  prior to CLP (white circle with red outline), or had an EAE score  $> 2$  prior to

255 CLP (red closed circle with red outline) surgery and non-EAE mice that underwent CLP surgery (red

256 closed circle with black outline). Data are cumulative of 2 independent experiments with 7-21 mice per

257 group. Error bars represent standard error of the mean. \*= $p$ -value $<0.05$ .

258

259 **Figure 2: Increased susceptibility of EAE mice to sepsis is independent of disease onset. A)**

260 Experimental Design: C57BL/6 mice were immunized with MOG<sub>35-55</sub> to induce EAE at day -25, -15, or -5  
261 prior to either sham or CLP surgery, age matched non-immunized (non-EAE) underwent CLP surgery at

262 the same time. Mortality was monitored in all cohorts. **(B)** EAE clinical scores of mice that were induced

263 for EAE at -25, -15, -5 prior to either sham or sepsis surgery. **(C)** Kaplan-Meier survival curves of day -

264 25 EAE mice that underwent sham surgery (black circle), non-EAE mice that underwent sepsis surgery

265 (red circle with black outline), and day -25 (red circle with red outline), day -15 (red semi-circle), and day

266 -5 (white circle with red outline) EAE mice that underwent CLP. Data are cumulative of 2 independent

267 experiments with 5-31 mice per group. Error bars represent standard error of the mean. \*= $p$ -value $<0.05$ .

268

269 **Figure 3: EAE mice have increased inflammation prior to and following sepsis induction. A)**  
270 Experimental Design: C57BL/6 mice were immunized with MOG<sub>35-55</sub> to induce EAE at day -25, -15, or -5  
271 prior to CLP surgery, age matched non-immunized (non-EAE) underwent CLP surgery at the same time.  
272 Plasma was collected prior to surgery and 12 hrs post-surgery. **(B)** Heatmap of normalized plasma IL-6,  
273 TNF, IL-1 $\beta$ , IFN $\gamma$ , IL-10, IL-2, and IL-12p70 concentrations in non-EAE, D5 EAE, D15 EAE, and D25  
274 EAE mice prior to and 12 hrs post-CLP surgery. **(C)** Radar plots of plasma IL-6, TNF, IL-1 $\beta$ , IFN $\gamma$ , IL-10,  
275 IL-2, and IL-12p70 in non-EAE mice (black line), D5 (dotted red line), D15 (dashed red line), and D25  
276 EAE mice (solid red line) prior to (top) and 12 hrs post- (bottom) CLP surgery. **(D)** Representative  
277 plasma cytokines (top to bottom: IL-6, TNF, IL-10) prior to (left) and 12hrs post- (right) CLP surgery in  
278 non-EAE (red circle with black outline), D5 EAE (white circle with red outline), D15 EAE (red semi-  
279 circle), and D25 EAE (red circle with red outline) mice. Grey dashed lines indicate the upper (ULOD) and  
280 lower (LLOD) limits of detection for the multiplex assay. Samples are combined from 2 independent  
281 experiments run on a single multiplex assay with 5-10 mice per group. Error bars represent standard  
282 error of the mean. \*= $p$ -value<0.05.

283  
284 **Figure 4: EAE mice have increased susceptibility to multiple sepsis models. A)** Experimental  
285 Design: C57BL/6 mice were immunized with MOG<sub>35-55</sub> to induce EAE 15 days prior to intraperitoneal  
286 LPS injection, age matched non-immunized (non-EAE) received identical injections. Plasma was  
287 collected prior to and 12 hrs post-LPS injection. Cohorts were monitored for survival. **(B)** EAE disease  
288 scores prior to LPS injection of EAE mice. **(C)** Kaplan-Meier survival curves for non-EAE and D15 EAE  
289 mice following LPS injection. **(D)** Plasma IL-6 prior to and 12 hrs post-LPS injection in non-EAE (red  
290 circle with black outline) and D15 EAE (red semi-circle). Grey dashed lines indicate the upper (ULOD)  
291 and lower (LLOD) limits of detection for IL-6 ELISA. **(E)** Experimental design: C57BL/6 mice were  
292 immunized with MOG<sub>35-55</sub> to induce EAE 15 days prior to intranasal *S. pneumoniae* infection, age  
293 matched non-immunized (non-EAE) received identical infections. Plasma was collected prior to and 12

294 hrs post-LPS injection. 3 mice from each cohort were used for determining lung CFU at 3 days post-  
295 infection. Remaining mice in each cohort were monitored for survival. **(F)** EAE disease scores prior to *S.*  
296 *pneumoniae* infection of EAE mice. **(G)** Kaplan-Meier survival curves for non-EAE and D15 EAE mice  
297 following *S. pneumoniae* infection. **(H)** Plasma IL-6 prior to and 12hrs post- *S. pneumoniae* infection in  
298 non-EAE (red circle with black outline) and D15 EAE (red semi-circle). Grey dashed line indicates the  
299 lower (LLOD) limits of detection for IL-6 ELISA. **(I)** *S. pneumoniae* CFU per gram of lung tissue 3 days  
300 after intranasal infection of non-EAE and D15 EAE mice. Dashed line indicates the limit of detection  
301 (LOD). Data are from a single experiment with 9-12 mice per group. Error bars represent standard error  
302 of the mean. \*=p-value<0.05.

303

304 **Figure 3-figure supplement 1: Mortality in EAE mice is associated with elevated inflammation.**

305 C57BL/6 mice were immunized with MOG<sub>35-55</sub> to induce EAE. EAE and age matched non-immunized  
306 (non-EAE) mice underwent CLP 35 days after EAE induction. Plasma cytokines were assessed prior to  
307 and 12 hrs post-CLP surgery in non-EAE, EAE mice that survived CLP-induced sepsis, and EAE mice  
308 that succumbed to CLP-induced sepsis. Plasma IL-6 **(A, B)** and IL-10 **(C, D)** prior to **(A, C)** and 12 hrs  
309 post- **(B, D)** CLP surgery in non-EAE, EAE mice that survived CLP-induced sepsis, and EAE mice that  
310 succumbed to CLP-induced sepsis. Grey dashed lines indicate the upper (ULOD) and lower (LLOD)  
311 limits of detection for the respective ELISA plate. Samples are combined from 2 independent  
312 experiments run on single ELISA plates with 5-8 mice per group. Error bars represent standard error of  
313 the mean. \*=p-value<0.05.

314

315 **Acknowledgements**

316 We thank members of our laboratories and the lab of Dr. Karandikar for technical assistance and helpful  
317 discussions.

318

319 **References**

- 320 Bogaert, D., de Groot, R., and Hermans, P.W.M. (2004). Streptococcus pneumoniae colonisation: the key  
321 to pneumococcal disease. *The Lancet Infectious Diseases* 4, 144-154.
- 322 Brown, J.S. (2012). Community-acquired pneumonia. *Clin Med (Northfield Il)* 12, 538-543.
- 323 Cabrera-Perez, J., Condotta, S.A., Badovinac, V.P., and Griffith, T.S. (2014). Impact of sepsis on CD4 T  
324 cell immunity. *J Leukoc Biol* 96, 767-777.
- 325 Capkun, G., Dahlke, F., Lahoz, R., Nordstrom, B., Tilson, H.H., Cutter, G., Bischof, D., Moore, A.,  
326 Simeone, J., Fraeman, K., *et al.* (2015). Mortality and comorbidities in patients with multiple sclerosis  
327 compared with a population without multiple sclerosis: An observational study using the US Department of  
328 Defense administrative claims database. *Multiple Sclerosis and Related Disorders* 4, 546-554.
- 329 Cavassani, K.A., Carson, W.F., IV, Moreira, A.P., Wen, H., Schaller, M.A., Ishii, M., Lindell, D.M., Dou, Y.,  
330 Lukacs, N.W., Keshamouni, V.G., *et al.* (2010). The post sepsis-induced expansion and enhanced function  
331 of regulatory T cells create an environment to potentiate tumor growth. *Blood* 115, 4403-4411.
- 332 CDC (2020). Sepsis: Data & Reports (<https://www.cdc.gov/sepsis/datareports/index.html>: CDC).
- 333 Danahy, D.B., Anthony, S.M., Jensen, I.J., Hartwig, S.M., Shan, Q., Xue, H.-H., Harty, J.T., Griffith, T.S.,  
334 and Badovinac, V.P. (2017). Polymicrobial sepsis impairs bystander recruitment of effector cells to infected  
335 skin despite optimal sensing and alarming function of skin resident memory CD8 T cells. *PLoS Pathog* 13,  
336 e1006569.
- 337 Danahy, D.B., Kurup, S.P., Winborn, C.S., Jensen, I.J., Harty, J.T., Griffith, T.S., and Badovinac, V.P.  
338 (2019). Sepsis-Induced State of Immunoparalysis Is Defined by Diminished CD8 T Cell–Mediated  
339 Antitumor Immunity. *J Immunol* 203, 725-735.
- 340 Danahy, D.B., Strother, R.K., Badovinac, V.P., and Griffith, T.S. (2016). Clinical and Experimental Sepsis  
341 Impairs CD8 T-Cell-Mediated Immunity. *Crit Rev Immunol* 36, 57-74.

- 342 Delano, M.J., and Ward, P.A. (2016). The immune system's role in sepsis progression, resolution, and  
343 long-term outcome. *Immunol Rev* 274, 330-353.
- 344 Dendrou, C.A., Fugger, L., and Friese, M.A. (2015). Immunopathology of multiple sclerosis. *Nature*  
345 *Reviews Immunology* 15, 545-558.
- 346 Dickson, K., and Lehmann, C. (2019). Inflammatory Response to Different Toxins in Experimental Sepsis  
347 Models. *Int J Mol Sci* 20, 4341.
- 348 Dombrovskiy, V.Y., Martin, A.A., Sunderram, J., and Paz, H.L. (2007). Rapid increase in hospitalization  
349 and mortality rates for severe sepsis in the United States: A trend analysis from 1993 to 2003\*. *Crit Care*  
350 *Med* 35, 1244-1250.
- 351 Duong, S., Condotta, S.A., Rai, D., Martin, M.D., Griffith, T.S., and Badovinac, V.P. (2014). Polymicrobial  
352 Sepsis Alters Antigen-Dependent and -Independent Memory CD8 T Cell Functions. *J Immunol* 192, 3618-  
353 3625.
- 354 Ernst, F.R., Pocoski, J., Cutter, G., Kaufman, D.W., and Pleimes, D. (2016). Analysis of Diagnoses  
355 Associated with Multiple Sclerosis–Related In-Hospital Mortality Using the Premier Hospital Database.  
356 *International Journal of MS Care* 18, 154-161.
- 357 Fox, E.J. (2004). Immunopathology of multiple sclerosis. *Neurology* 63, S3-S7.
- 358 Freedman, S.N., Shahi, S.K., and Mangalam, A.K. (2018). The “Gut Feeling”: Breaking Down the Role of  
359 Gut Microbiome in Multiple Sclerosis. *Neurotherapeutics* 15, 109-125.
- 360 Gaieski, D.F., Edwards, J.M., Kallan, M.J., and Carr, B.G. (2013). Benchmarking the Incidence and  
361 Mortality of Severe Sepsis in the United States\*. *Crit Care Med* 41, 1167-1174.
- 362 Harding, K., Zhu, F., Alotaibi, M., Duggan, T., Tremlett, H., and Kingwell, E. (2020). Multiple cause of death  
363 analysis in multiple sclerosis. A population-based study 94, e820-e829.
- 364 Hotchkiss, R.S., Moldawer, L.L., Opal, S.M., Reinhart, K., Turnbull, I.R., and Vincent, J.-L. (2016). Sepsis  
365 and septic shock. *Nat Rev Dis Primers* 2, 16045.

- 366 Huggins, M.A., Sjaastad, F.V., Pierson, M., Kucaba, T.A., Swanson, W., Staley, C., Weingarden, A.R.,  
367 Jensen, I.J., Danahy, D.B., Badovinac, V.P., *et al.* (2019). Microbial Exposure Enhances Immunity to  
368 Pathogens Recognized by TLR2 but Increases Susceptibility to Cytokine Storm through TLR4  
369 Sensitization. *Cell Rep* 28, 1729-1743.e1725.
- 370 Jeganathan, N., Yau, S., Ahuja, N., Otu, D., Stein, B., Fogg, L., and Balk, R. (2017). The characteristics  
371 and impact of source of infection on sepsis-related ICU outcomes. *J Crit Care* 41, 170-176.
- 372 Jensen, I.J., Jensen, S.N., Sjaastad, F.V., Gibson-Corley, K.N., Dileepan, T., Griffith, T.S., Mangalam,  
373 A.K., and Badovinac, V.P. (2020). Sepsis impedes EAE disease development and diminishes autoantigen-  
374 specific naïve CD4 T cells. *eLife* 9, e55800.
- 375 Jensen, I.J., McGonagill, P.W., Butler, N.S., Harty, J.T., Griffith, T.S., and Badovinac, V.P. (2021). NK Cell-  
376 Derived IL-10 Supports Host Survival during Sepsis. *J Immunol* 206, 1171-1180.
- 377 Jensen, I.J., Sjaastad, F.V., Griffith, T.S., and Badovinac, V.P. (2018a). Sepsis-Induced T Cell  
378 Immunoparalysis: The Ins and Outs of Impaired T Cell Immunity. *J Immunol* 200, 1543-1553.
- 379 Jensen, I.J., Winborn, C.S., Fosdick, M.G., Shao, P., Tremblay, M.M., Shan, Q., Tripathy, S.K., Snyder,  
380 C.M., Xue, H.-H., Griffith, T.S., *et al.* (2018b). Polymicrobial sepsis influences NK-cell-mediated immunity  
381 by diminishing NK-cell-intrinsic receptor-mediated effector responses to viral ligands or infections. *PLoS*  
382 *Pathog* 14, e1007405.
- 383 Livingston, G. (2016). Profile of US veterans is changing dramatically as their ranks decline (Pew Research  
384 Center: Pew Research Center).
- 385 Luna, G., Alping, P., Burman, J., Fink, K., Fogdell-Hahn, A., Gunnarsson, M., Hillert, J., Langer-Gould, A.,  
386 Lycke, J., Nilsson, P., *et al.* (2020). Infection Risks Among Patients With Multiple Sclerosis Treated With  
387 Fingolimod, Natalizumab, Rituximab, and Injectable Therapies. *JAMA Neurology* 77, 184-191.
- 388 Ma, L., Zhang, H., Yin, Y.-I., Guo, W.-z., Ma, Y.-q., Wang, Y.-b., Shu, C., and Dong, L.-q. (2016). Role of  
389 interleukin-6 to differentiate sepsis from non-infectious systemic inflammatory response syndrome.  
390 *Cytokine* 88, 126-135.



- 391 Mangalam, A., Luckey, D., Basal, E., Jackson, M., Smart, M., Rodriguez, M., and David, C. (2009). HLA-  
392 DQ8 (DQB1\*0302)-Restricted Th17 Cells Exacerbate Experimental Autoimmune Encephalomyelitis in  
393 HLA-DR3-Transgenic Mice. *J Immunol* 182, 5131-5139.
- 394 Martin, M.D., Badovinac, V.P., and Griffith, T.S. (2020). CD4 T Cell Responses and the Sepsis-Induced  
395 Immunoparalysis State. *Front Immunol* 11, 1364.
- 396 Medeiros Junior, W.L.G.d., Demore, C.C., Mazaro, L.P., de Souza, M.F.N., Parolin, L.F., Melo, L.H.,  
397 Junior, C.R.W., and Gonçalves, M.V.M. (2020). Urinary tract infection in patients with multiple sclerosis: An  
398 overview. *Multiple Sclerosis and Related Disorders* 46, 102462.
- 399 Nelson, R.E., Xie, Y., DuVall, S.L., Butler, J., Kamau, A.W.C., Knippenberg, K., Schuerch, M., Foskett, N.,  
400 and LaFleur, J. (2015). Multiple Sclerosis and Risk of Infection-Related Hospitalization and Death in US  
401 Veterans. *International Journal of MS Care* 17, 221-230.
- 402 Qiao, Z., Wang, W., Yin, L., Luo, P., Greven, J., Horst, K., and Hildebrand, F. (2018). Using IL-6  
403 concentrations in the first 24 h following trauma to predict immunological complications and mortality in  
404 trauma patients: a meta-analysis. *Eur J Trauma Emerg Surg* 44, 679-687.
- 405 Qiu, X., Zhang, L., Tong, Y., Qu, Y., Wang, H., and Mu, D. (2018). Interleukin-6 for early diagnosis of  
406 neonatal sepsis with premature rupture of the membranes: A meta-analysis. *Medicine* 97, e13146.
- 407 Rhee, C., Dantes, R., Epstein, L., Murphy, D.J., Seymour, C.W., Iwashyna, T.J., Kadri, S.S., Angus, D.C.,  
408 Danner, R.L., Fiore, A.E., *et al.* (2017). Incidence and Trends of Sepsis in US Hospitals Using Clinical vs  
409 Claims Data, 2009-2014. *JAMA* 318, 1241-1249.
- 410 Rhee, C., Wang, R., Zhang, Z., Fram, D., Kadri, S.S., Klompas, M., and Program, f.t.C.P.E. (2019).  
411 Epidemiology of Hospital-Onset Versus Community-Onset Sepsis in U.S. Hospitals and Association With  
412 Mortality: A Retrospective Analysis Using Electronic Clinical Data. *Crit Care Med* 47, 1169-1176.
- 413 Rudd, K.E., Johnson, S.C., Agesa, K.M., Shackelford, K.A., Tsoi, D., Kievlan, D.R., Colombara, D.V., Ikuta,  
414 K.S., Kissoon, N., Finfer, S., *et al.* (2020). Global, regional, and national sepsis incidence and mortality,  
415 1990–2017: analysis for the Global Burden of Disease Study. *The Lancet* 395, 200-211.

- 416 Scumpia, P.O., Delano, M.J., Kelly, K.M., O'Malley, K.A., Efron, P.A., McAuliffe, P.F., Brusko, T., Ungaro,  
417 R., Barker, T., Wynn, J.L., *et al.* (2006). Increased Natural CD4<sup>+</sup>CD25<sup>+</sup>  
418 Regulatory T Cells and Their Suppressor Activity Do Not Contribute to Mortality in Murine Polymicrobial  
419 Sepsis. *J Immunol* *177*, 7943-7949.
- 420 Sharma, A., Yang, W.-L., Matsuo, S., and Wang, P. (2015). Differential alterations of tissue T-cell subsets  
421 after sepsis. *Immunol Lett* *168*, 41-50.
- 422 Sjaastad, F.V., Jensen, I.J., Berton, R.R., Badovinac, V.P., and Griffith, T.S. (2020a). Inducing  
423 Experimental Polymicrobial Sepsis by Cecal Ligation and Puncture. *Curr Protoc Immunol* *131*, e110.
- 424 Sjaastad, F.V., Kucaba, T.A., Dileepan, T., Swanson, W., Dail, C., Cabrera-Perez, J., Murphy, K.A.,  
425 Badovinac, V.P., and Griffith, T.S. (2020b). Polymicrobial Sepsis Impairs Antigen-Specific Memory CD4 T  
426 Cell-Mediated Immunity. *Front Immunol* *11*, 1786.
- 427 Tintore, M., Vidal-Jordana, A., and Sastre-Garriga, J. (2019). Treatment of multiple sclerosis — success  
428 from bench to bedside. *Nature Reviews Neurology* *15*, 53-58.
- 429 Walton, C., King, R., Rechtman, L., Kaye, W., Leray, E., Marrie, R.A., Robertson, N., La Rocca, N.,  
430 Uitdehaag, B., van der Mei, I., *et al.* (2020). Rising prevalence of multiple sclerosis worldwide: Insights from  
431 the Atlas of MS, third edition. *Multiple Sclerosis Journal* *26*, 1816-1821.
- 432 Yong, K.P., and Kim, H.J. (2020). Disease modifying therapies and infection risks in multiple sclerosis—a  
433 decision-making conundrum. *Annals of Translational Medicine* *8*, 722.

434  
435

## Methods

| Key Resources Table                |             |                     |             |                        |
|------------------------------------|-------------|---------------------|-------------|------------------------|
| Reagent type (species) or resource | Designation | Source or reference | Identifiers | Additional information |
|                                    |             |                     |             |                        |

|                                                               |                                                  |                                                                                                                                                                |                                                                                                |                                                                |
|---------------------------------------------------------------|--------------------------------------------------|----------------------------------------------------------------------------------------------------------------------------------------------------------------|------------------------------------------------------------------------------------------------|----------------------------------------------------------------|
| strain, strain background ( <i>Mus musculus</i> )             | C57BL6/J                                         | Jackson Laboratory                                                                                                                                             | Stock No: 000664 (RRID:IMSR_JAX:000664)                                                        |                                                                |
| peptide, recombinant protein                                  | MOG <sub>35-55</sub>                             | GenScript                                                                                                                                                      | SC1208                                                                                         |                                                                |
| other                                                         | CFA containing <i>M. tuberculosis</i> H37Ra      | Difco                                                                                                                                                          | DF3114-33-8                                                                                    |                                                                |
| peptide, recombinant protein                                  | Pertussis toxin from <i>Bordetella pertussis</i> | Sigma-Aldrich                                                                                                                                                  | P7208                                                                                          |                                                                |
| peptide, recombinant protein                                  | LPS ( <i>E. coli</i> O55:B5)                     | Sigma                                                                                                                                                          | L2880-25MG                                                                                     | 2.5mg/kg of mouse body weight                                  |
| strain, strain background ( <i>Streptococcus pneumoniae</i> ) | <i>Streptococcus pneumoniae</i>                  | Wanke-Jellinek et al. Beneficial Effects of CpG-Oligodeoxynucleotide Treatment on Trauma and Secondary Lung Infection. <i>J Immunol.</i> 196(2):767-77 (2016). |                                                                                                | Can be acquired through lab contact                            |
| commercial assay or kit                                       | ProcartaPlex 7-plex                              | Thermo-Fischer                                                                                                                                                 | AB_2575918<br>AB_2575931<br>AB_2575930<br>AB_2575920<br>AB_2575919<br>AB_2575917<br>AB_2575926 | IL-6, TNF, IL-1 $\beta$ , IL-10, IFN $\gamma$ , IL-2, IL-12p70 |

|                        |                      |                     |                                                     |                   |
|------------------------|----------------------|---------------------|-----------------------------------------------------|-------------------|
| antibody               | IL-10<br>(JES5-16E3) | Biolegend           | AB_315358                                           | ELISA<br>(1µg/mL) |
| antibody               | IL-10<br>(JES5-2A5)  | Biolegend           | AB_315349                                           | ELISA<br>(2µg/mL) |
| antibody               | IL-6<br>(MP5-32C11)  | Biolegend           | AB_2233898                                          | ELISA<br>(1µg/mL) |
| antibody               | IL-6<br>(MP5-20F3)   | Biolegend           | AB_315336                                           | ELISA<br>(2µg/mL) |
| software,<br>algorithm | GraphPad Prism       | GraphPad<br>Prism 8 | Version 8.4.2<br>(464)<br><br>(RRID:SCR_0<br>02798) |                   |

436

437 Retrospective Patient Assessment

438 TriNetX was utilized to query a limited, deidentified dataset of patients at the University of Iowa admitted  
439 between 2008 and 2020. Adult patients (age 18 to 119 years) who had inpatient encounters were  
440 queried. Since this period spans the transition from ICD-9 to ICD-10 coding, the TriNetX software uses  
441 algorithms to transform ICD-9 codes to ICD-10 codes. Sepsis patients were queried for all ICD-10  
442 codes including “sepsis” in their description utilizing the [or] operator. Multiple sclerosis patients were  
443 queried using ICD-10 code group G35 Multiple sclerosis. TriNetX is compliant with the Health Insurance  
444 Portability and Accountability Act (HIPAA), the US federal law which protects the privacy and security of  
445 healthcare data. TriNetX is certified to the ISO 27001:2013 standard and maintains an Information  
446 Security Management System (ISMS) to ensure the protection of the healthcare data it has access to  
447 and to meet the requirements of the HIPAA Security Rule. Any data displayed on the TriNetX Platform in  
448 aggregate form, or any patient level data provided in a data set generated by the TriNetX Platform, only  
449 contains de-identified data as per the de-identification standard defined in Section §164.514(a) of the  
450 HIPAA Privacy Rule. The process by which the data is de-identified is attested to through a formal

451 determination by a qualified expert as defined in Section §164.514(b)(1) of the HIPAA Privacy Rule.  
452 TriNetX is supported by the Institute for Clinical and Translational Science at the University of Iowa.  
453 The Institute for Clinical and Translational Science at the University of Iowa is supported by the National  
454 Institutes of Health (NIH) Clinical and Translational Science Award (CTSA) program, grant  
455 UL1TR002537. The CTSA program is led by the NIH's National Center for Advancing Translational  
456 Sciences (NCATS). This publication's contents are solely the responsibility of the authors and do not  
457 necessarily represent the official views of the NIH.

458

#### 459 Ethics statement

460 Experimental procedures using mice were approved by University of Iowa Animal Care and Use  
461 Committee under ACURF protocol #6121915 and #9101915. The experiments performed followed  
462 Office of Laboratory Animal Welfare guidelines and PHS Policy on Humane Care and Use of Laboratory  
463 Animals. Cervical dislocation was used as the euthanasia method of all experimental mice.

464

#### 465 Mice

466 Inbred C57Bl/6 (B6; Thy1.2/1.2) were purchased from the National Cancer Institute (Frederick, MD) and  
467 maintained in the animal facilities at the University of Iowa at the appropriate biosafety level.

468

#### 469 Cecal ligation and puncture (CLP) model of sepsis induction

470 CLP surgery was performed as previously described (Sjaastad et al., 2020a). Briefly, mice were  
471 anesthetized with ketamine/xylazine (University of Iowa, Office of Animal Resources), the abdomen was  
472 shaved and disinfected with Betadine (Purdue Products), and a midline incision was made. The distal  
473 third of the cecum was ligated with Perma-Hand Silk (Ethicon), punctured once using a 25-gauge  
474 needle, and a small amount of fecal matter extruded. The cecum was returned to abdomen, the  
475 peritoneum was closed with 641G Perma-Hand Silk (Ethicon), and skin sealed using surgical Vetbond

476 (3M). Following surgery, 1 mL PBS was administered s.c. to provide post-surgery fluid resuscitation.  
477 Lidocaine was administered at the incision site, and flunixin meglumine (Phoenix) was administered for  
478 postoperative analgesia. This procedure created a septic state characterized by loss of appetite and  
479 body weight, ruffled hair, shivering, diarrhea, and/or periorbital exudates with 0–10% mortality rate.  
480 Sham mice underwent identical surgery excluding cecal ligation and puncture.

481

#### 482 LPS Endotoxemia induction

483 Mice received a single intraperitoneal injection of LPS-EB from *E. coli* O55:B5 (2.5 mg/kg body weight;  
484 Sigma), as previously described (Huggins et al., 2019).

485

#### 486 *Streptococcus pneumoniae* infection

487 *Streptococcus* was grown in brain heart infusion (BHI) broth then pelleted by centrifugation. Pellet was  
488 washed three times and diluted to a target absorbance of 0.1 using PBS, as measured by ABS<sub>600</sub>. Mice  
489 were anesthetized with ketamine/xylazine and received 40 $\mu$ L of *Streptococcus pneumoniae* by  
490 intranasal inoculation. Infectious dose was confirmed by plating inoculum (1.5x10<sup>6</sup> CFU/ mouse) on BHI  
491 plates.

492

493 CFU per gram of lung was determined by sacrificing mice and weighing the lungs. Lungs were  
494 mechanically homogenized in 1mL of PBS. 20 $\mu$ L of homogenate on BHI plates in duplicate.

495

#### 496 EAE Disease Induction and Evaluation

497 EAE was induced and evaluated as shown previously (Mangalam et al., 2009). Briefly, mice were  
498 immunized s.c. on day 0 on the left and right flank with 100  $\mu$ g of MOG<sub>35-55</sub> emulsified in Complete  
499 Freund's Adjuvant followed by 80 ng of pertussis toxin (PTX) i.p. on days 0 and 2. Disease severity was

500 scored as follows: 0, no clinical symptoms; 1, loss of tail tonic; 2, hind limb weakness; 3, hind limb  
501 paralysis; 4, fore limb weakness; 5, moribund or death.

502

### 503 Cytokine Analysis

504 Multiplex cytokine analysis was performed via Thermo-Fischer ProcartaPlex 7-plex  
505 according to the manufacturer's instructions for plasma cytokine analysis. Multiplex was analyzed on  
506 BioRad Bio-Plex (Luminex 200) analyzer in the University of Iowa Flow Cytometry core facility.

507

508 IL-6 and IL-10 ELISAs (ELISA MAX Deluxe Set, Biolegend) were performed according to the  
509 manufacturer's instructions.

510

### 511 Statistical Analysis

512 Unless stated otherwise data were analyzed using Prism 8 software (GraphPad) using two-tailed  
513 Student t-test (for 2 individual groups, if variance was unequal variance then Mann-Whitney U test), one-  
514 way ANOVA with Bonferroni post-hoc test (for >2 individual groups, if variance was unequal variance  
515 then Kruskal-Wallis with Dunn's post-hoc test was used), two-way ANOVA (for multiparametric analysis  
516 of 2 or more individual groups, pairing was used for samples that came from the same animal) with a  
517 confidence interval of >95% to determine significance (\*p < 0.05). Log-rank (Mantel-Cox) curve  
518 comparisons was used to determine significant difference in time to disease EAE disease onset (\*p <  
519 0.05). Data are presented as standard error of the mean.

520

### 521 **Source data**

#### 522 Figure 1-source data 1

523 Source data for Figure 1.

524

525 Figure 2-source data

526 Source data for Figure 2.

527

528 Figure 3-source data

529 Source data for Figure 3.

530

531 Figure 4-source data 1

532 Source data for Figure 4B, C.

533

534 Figure 4-source data 2

535 Source data for Figure 4D.

536

537 Figure 4-source data 3

538 Source data for Figure 4F, G.

539

540 Figure 4-source data 4

541 Source data for Figure 4H.

542

543 Figure 4-source data 5

544 Source data for Figure 4I.

545

546 Figure 3-figure supplement 1-source data 1

547 Source data for Figure 3-figure supplement 1 A, B.

548

549 Figure 3-figure supplement 1-source data 2



550 Source data for Figure 3-figure supplement 1 C, D.

551

552 Table 1-source data

553 Source data for Table 1.

554

**Table 1**

| Patient Cohort | All Inpatient | Non-septic | Septic     | % Septic | Non-Septic vs Septic |
|----------------|---------------|------------|------------|----------|----------------------|
| Total          | 211470        | 188540     | 22930      | 10.8%    |                      |
| Age (+/- SD)   | 58 (+/-20)    | 57 (+/-21) | 64 (+/-17) |          | <0.0001              |
| % Male         | 47%           | 46%        | 53%        |          | <0.0001              |
| % Caucasian    | 87%           | 86%        | 88%        |          | <0.0001              |
| Non-MS         | 210290        | 187530     | 22760      | 10.8%    |                      |
| Age (+/- SD)   |               | 57 (+/-21) | 64 (+/-17) |          | <0.0001              |
| % Male         |               | 46%        | 53%        |          | <0.0001              |
| % Caucasian    |               | 86%        | 89%        |          | <0.0001              |
| MS             | 1180          | 1010       | 170        | 14.4%    |                      |
| Age (+/- SD)   |               | 56 (+/-16) | 64 (+/-14) |          | <0.0001              |
| % Male         |               | 26%        | 35%        |          | 0.0159               |
| % Caucasian    |               | 89%        | 88%        |          | ns                   |

  

|              |                   | Age (+/-SD) |           | % Male  |     | % Caucasian |     |
|--------------|-------------------|-------------|-----------|---------|-----|-------------|-----|
| Non-MS vs MS | Sepsis odds ratio | Non-MS      | MS        | Non-MS  | MS  | Non-MS      | MS  |
|              | 1.387             | 60.5 (+/-5) | 60 (+/-6) | 47%     | 27% | 86%         | 89% |
| p-value      | 0.0001            | ns          |           | <0.0001 |     | 0.0121      |     |

# Figure 1

bioRxiv preprint doi: <https://doi.org/10.1101/2021.07.06.451335>; this version posted July 8, 2021. The copyright holder for this preprint (which was not certified by peer review) is the author/funder, who has granted bioRxiv a license to display the preprint in perpetuity. It is made available under aCC-BY 4.0 International license.

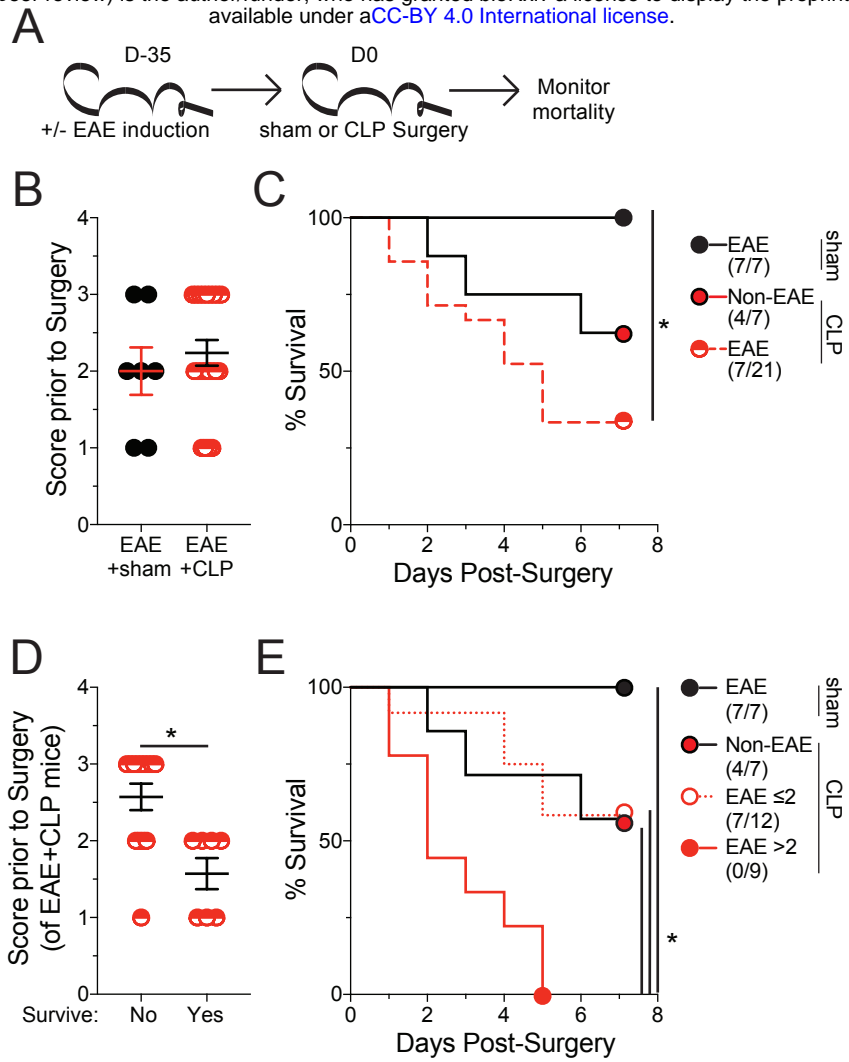

# Figure 2

bioRxiv preprint doi: <https://doi.org/10.1101/2021.07.06.451335>; this version posted July 8, 2021. The copyright holder for this preprint (which was not certified by peer review) is the author/funder, who has granted bioRxiv a license to display the preprint in perpetuity. It is made available under a [CC-BY 4.0 International license](https://creativecommons.org/licenses/by/4.0/).

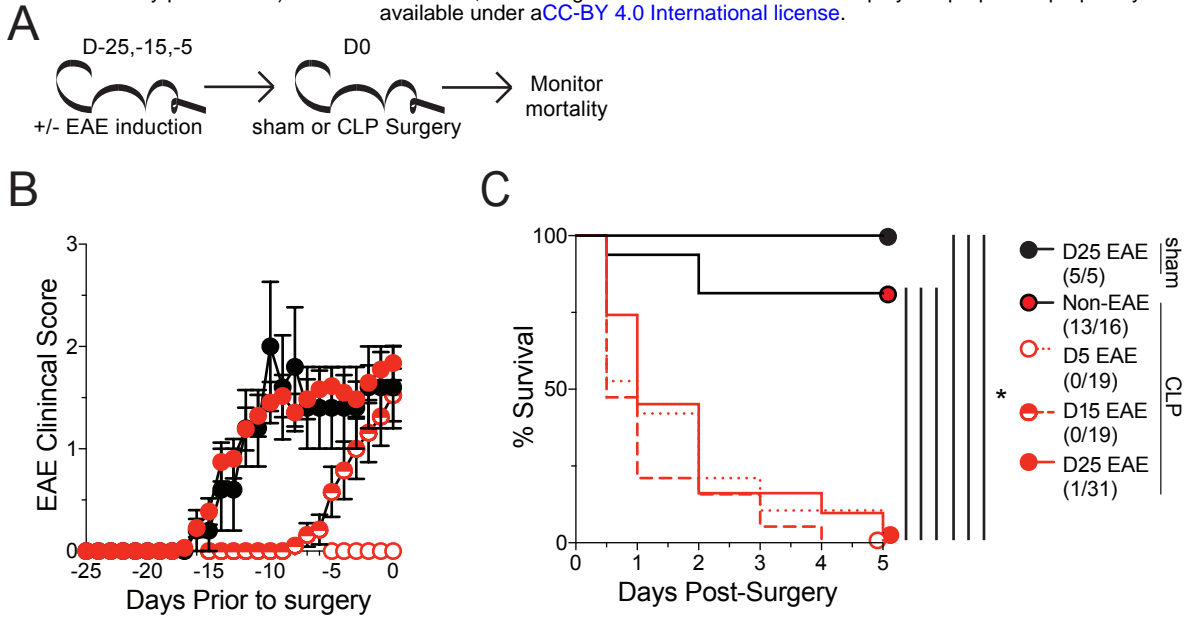

# Figure 3

bioRxiv preprint doi: <https://doi.org/10.1101/2021.07.06.451335>; this version posted July 8, 2021. The copyright holder for this preprint (which was not certified by peer review) is the author/funder, who has granted bioRxiv a license to display the preprint in perpetuity. It is made available under aCC-BY 4.0 International license.

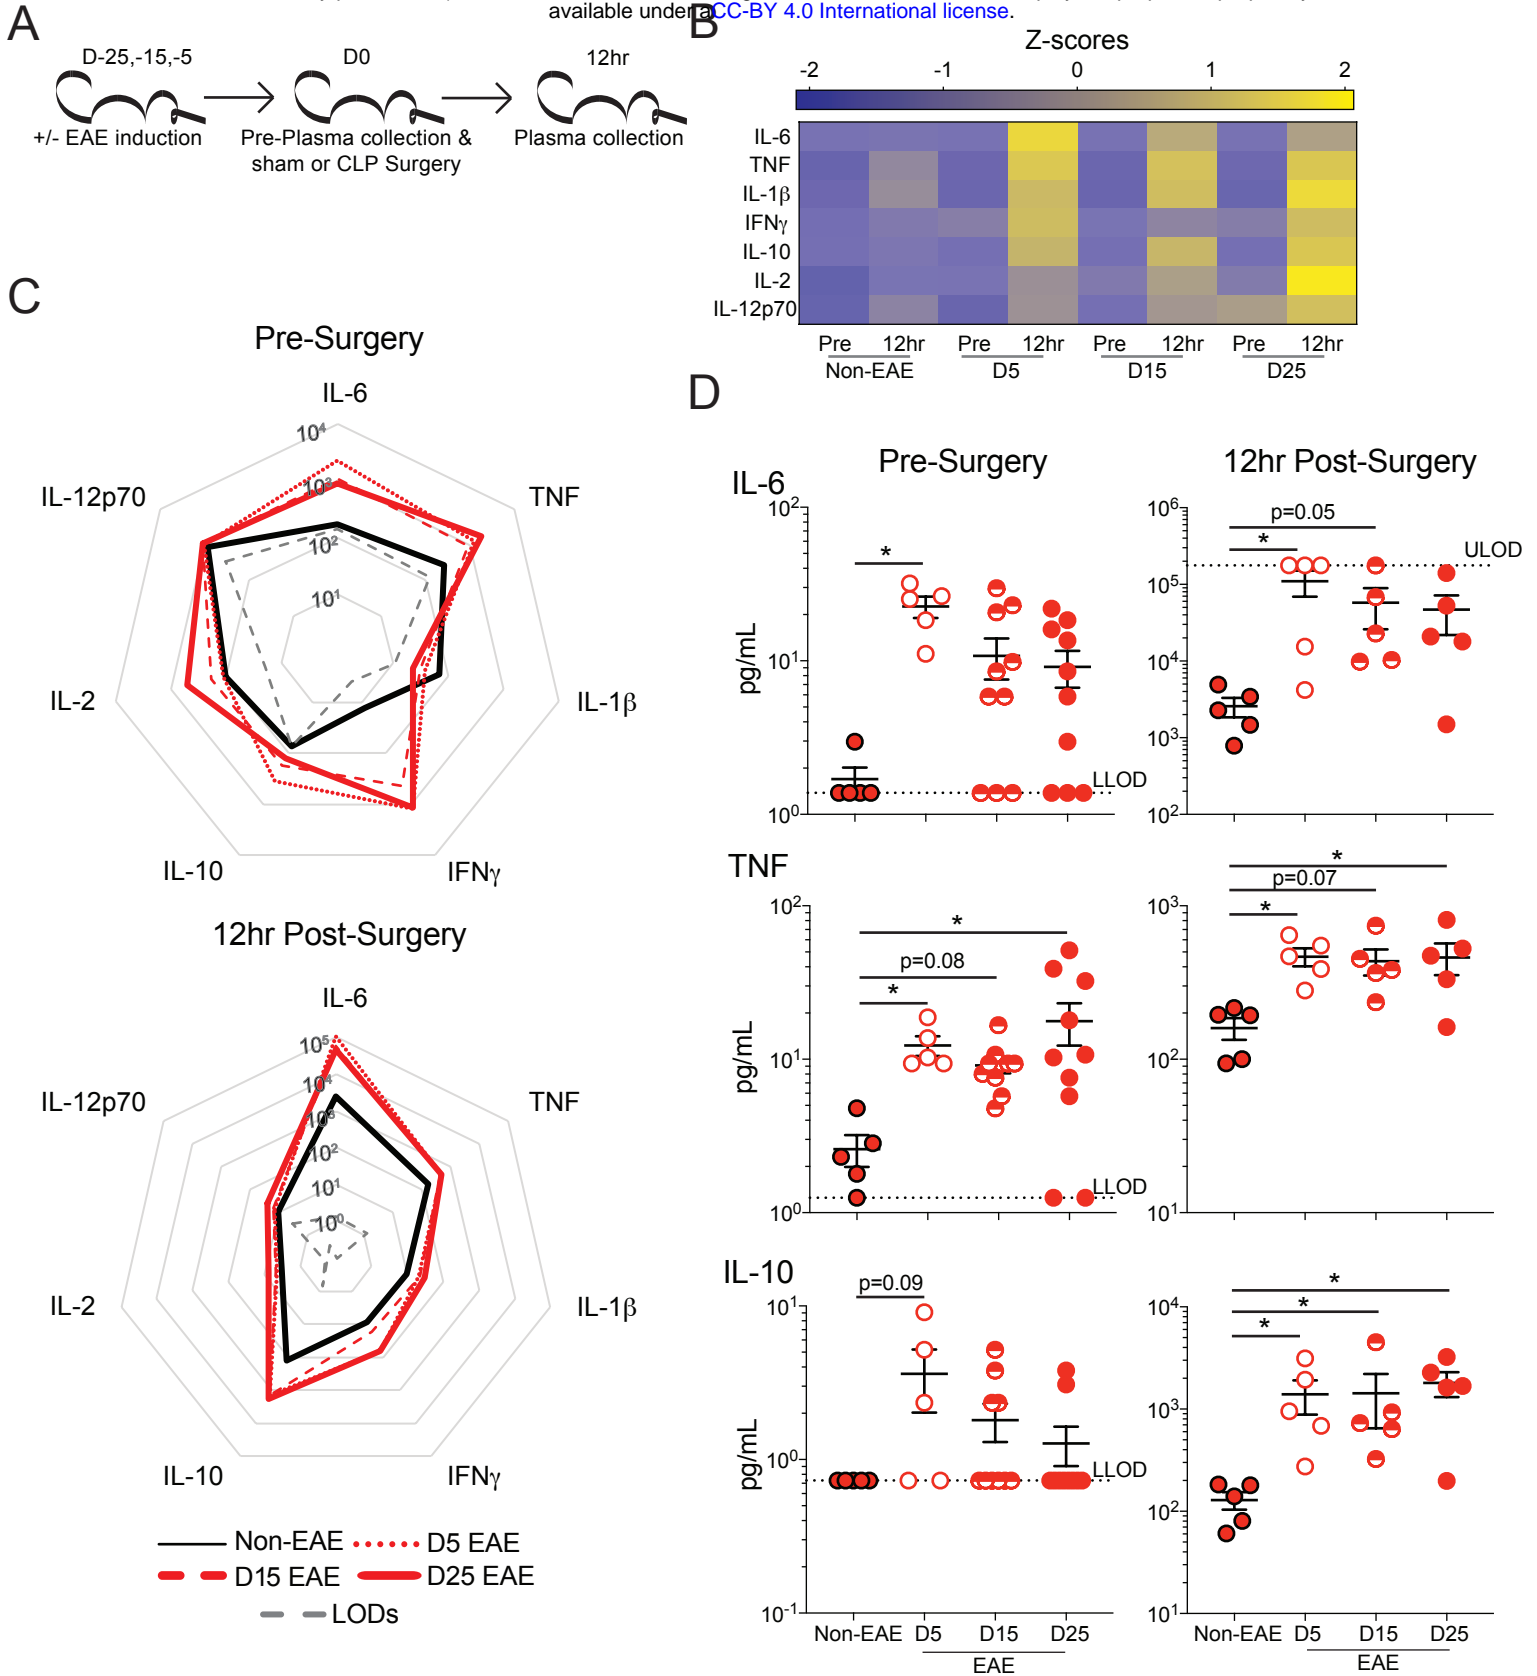

# Figure 4

bioRxiv preprint doi: <https://doi.org/10.1101/2021.07.06.451335>; this version posted July 8, 2021. The copyright holder for this preprint (which was not certified by peer review) is the author/funder, who has granted bioRxiv a license to display the preprint in perpetuity. It is made available under aCC-BY 4.0 International license.

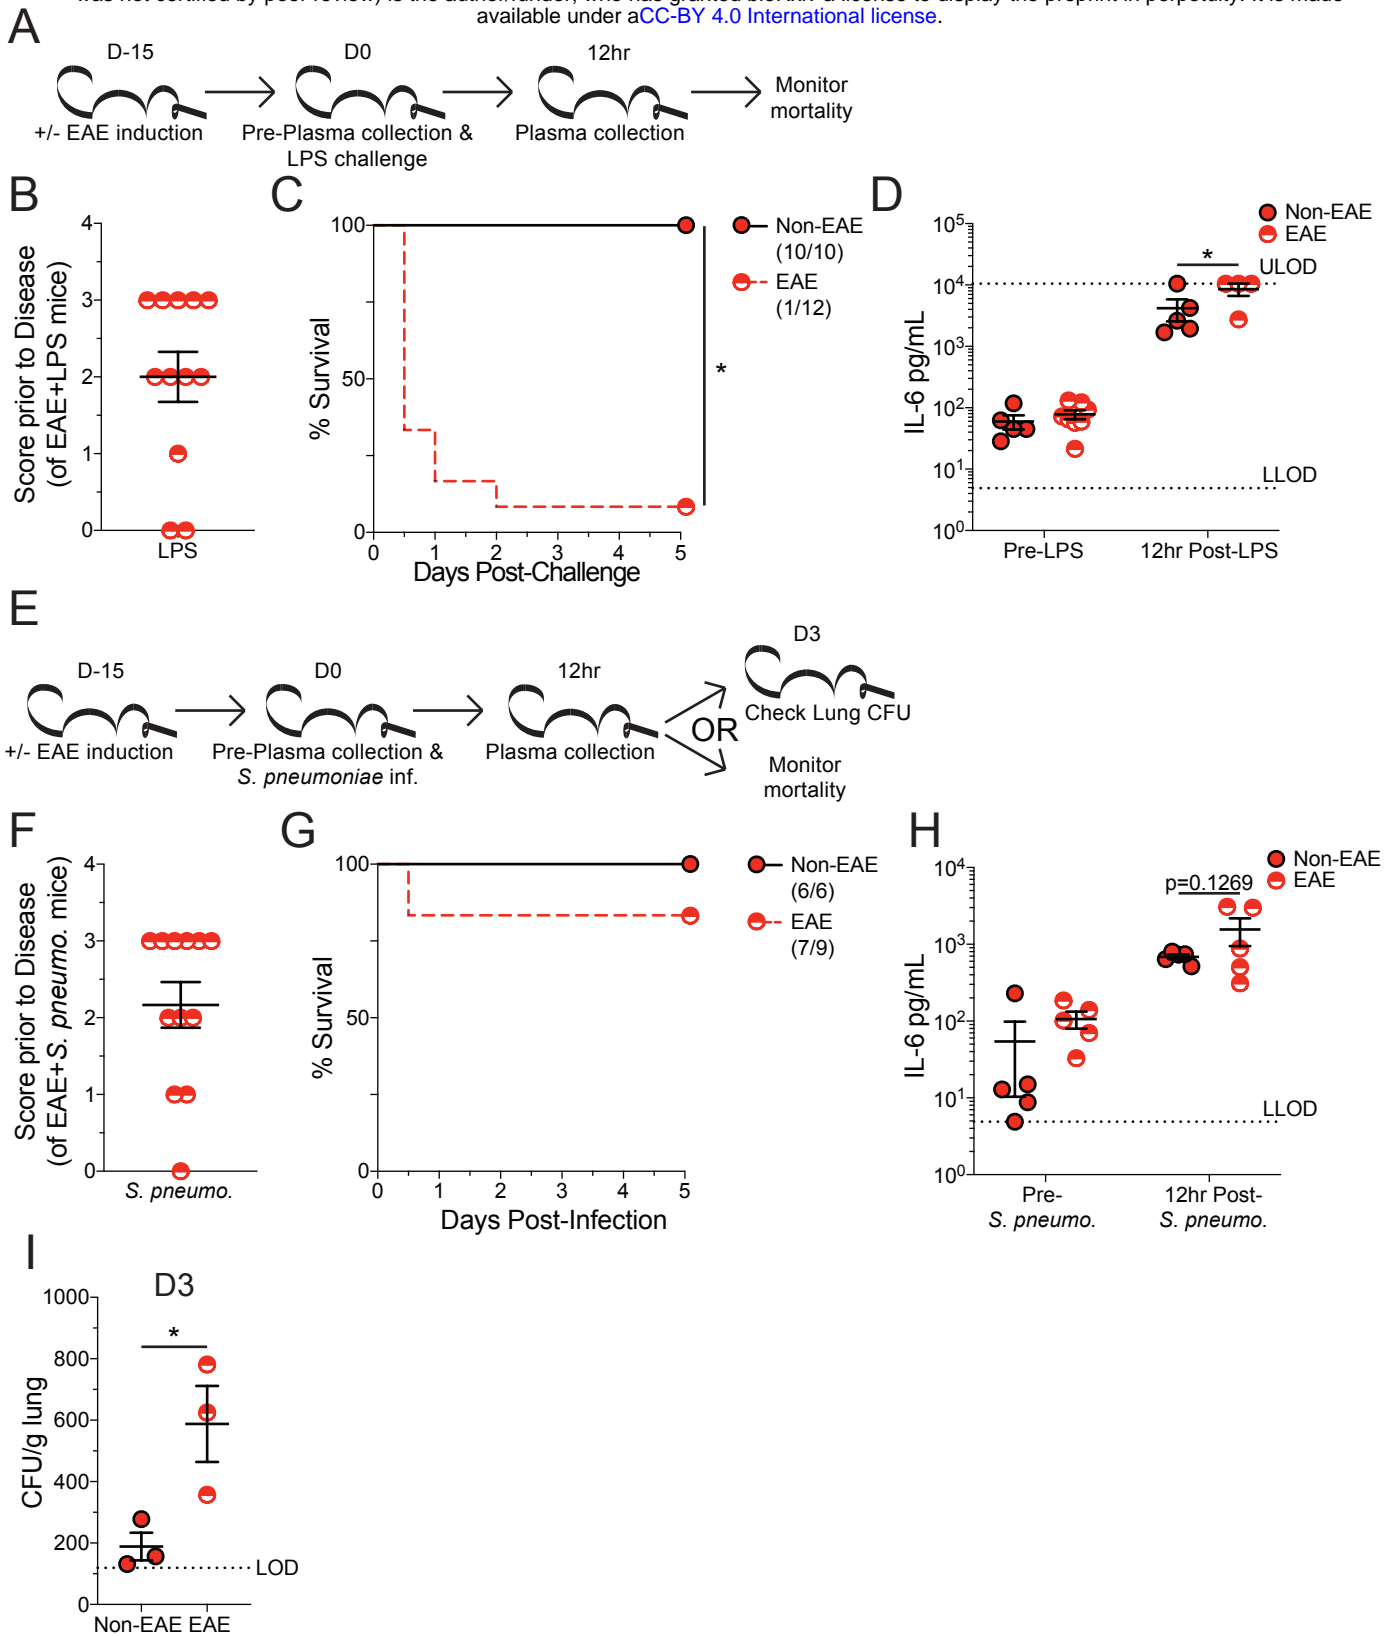

# Figure 3-figure supplement 1

bioRxiv preprint doi: <https://doi.org/10.1101/2021.07.06.451935>; this version posted July 8, 2021. The copyright holder for this preprint (which was not certified by peer review) is the author/funder, who has granted bioRxiv a license to display the preprint in perpetuity. It is made available under aCC-BY 4.0 International license.

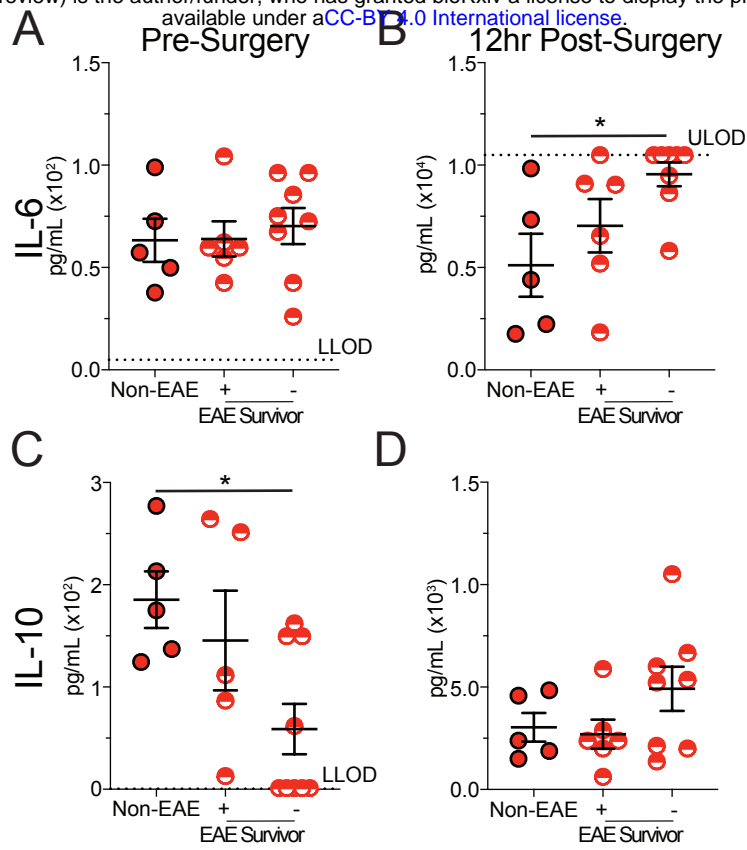

Source: https://www.biorxiv.org/content/10.1101/2021.07.06.451335v1.full.pdf
